# Supplementary material
Source: PubMed Central journal article supplement (PMC4165615)
Supplement: 42_2014-03_1.pdf [file 42_2014-03_1.pdf]

**Table S1. MST results of Chinese SFGR isolates using *dksA-xerC* primer pairs**

| <b>Genotype</b>            | <b>Isolates</b> | <b>nt.60</b> | <b>nt.99</b> | <b>nt.126</b> | <b>nt.140</b> | <b>nt.179</b> | <b>nt.182</b> | <b>nt.191</b> | <b>nt.199</b> |
|----------------------------|-----------------|--------------|--------------|---------------|---------------|---------------|---------------|---------------|---------------|
| <i>R.heilongjiangensis</i> |                 | T            | A            | T             | T             | T             | T             | A             | T             |
| A1(1)                      | m8              | C            | A            | T             | T             | T             | T             | A             | T             |
| B1(1)                      | m9              | T            | G            | T             | T             | T             | T             | A             | T             |
| C1(1)                      | m28             | T            | A            | C             | T             | T             | T             | A             | T             |
| D1(1)                      | h27             | T            | A            | T             | C             | T             | T             | A             | T             |
| E1(1)                      | m2              | T            | A            | T             | T             | C             | T             | A             | T             |
| F1(1)                      | m30             | T            | A            | T             | T             | T             | T             | G             | -             |
| G1(1)                      | m14             | T            | A            | T             | T             | T             | C             | A             | T             |
| H1(55)                     | h3              | T            | A            | T             | T             | T             | T             | A             | T             |

nt225
