# Supplementary material
Source: PubMed Central journal article supplement (PMC4165615)
Supplement: 42_2014-03_2.pdf [file 42_2014-03_2.pdf]

**Table S2. MST results of Chinese SFGR isolates using *spo0J-abcT1C* primer pairs**

| <b>Genotype</b>            | <b>Isolates</b> | <b>nt.15</b> | <b>nt.44</b> | <b>nt.50</b> | <b>nt.61</b> | <b>nt.90</b> | <b>nt.101</b> | <b>nt.132</b> | <b>nt.135</b> | <b>nt.174</b> | <b>nt.190</b> | <b>nt.218</b> | <b>nt.221</b> | <b>nt.239</b> | <b>nt.247</b> |
|----------------------------|-----------------|--------------|--------------|--------------|--------------|--------------|---------------|---------------|---------------|---------------|---------------|---------------|---------------|---------------|---------------|
| <i>R.heilongjiangensis</i> |                 | A            | A            | C            | T            | A            | A             | T             | T             | T             | T             | A             | T             | A             | T             |
| A2(1)                      | m22             | -            | A            | C            | T            | A            | A             | T             | T             | T             | T             | A             | T             | G             | T             |
| B2(1)                      | m32             | A            | G            | C            | C            | A            | A             | T             | T             | T             | T             | A             | T             | G             | T             |
| C2(1)                      | m18             | A            | A            | T            | T            | A            | A             | T             | T             | T             | T             | A             | T             | G             | T             |
| D2(1)                      | h13             | A            | A            | C            | T            | G            | A             | T             | T             | T             | T             | A             | T             | G             | T             |
| E2(1)                      | m31             | A            | A            | C            | T            | A            | G             | T             | T             | T             | T             | A             | T             | G             | T             |
| F2(1)                      | m7              | A            | A            | C            | T            | A            | A             | C             | T             | T             | T             | A             | T             | G             | T             |
| G2(1)                      | m1              | A            | A            | C            | T            | A            | A             | T             | C             | T             | T             | A             | T             | G             | T             |
| H2(1)                      | h7              | A            | A            | C            | T            | A            | A             | T             | T             | C             | T             | A             | T             | G             | T             |
| I2(1)                      | m30             | A            | A            | C            | T            | A            | A             | T             | T             | T             | C             | A             | T             | G             | T             |
| J2(1)                      | h4              | A            | A            | C            | T            | A            | A             | T             | T             | T             | T             | G             | T             | G             | T             |
| K2(1)                      | m28             | A            | A            | C            | T            | A            | A             | T             | T             | T             | T             | A             | C             | G             | T             |
| L2(1)                      | m4              | A            | A            | C            | T            | A            | A             | T             | T             | T             | T             | A             | T             | G             | -             |
| M2(48)                     | h3              | A            | A            | C            | T            | A            | A             | T             | T             | T             | T             | A             | T             | G             | T             |
