# Supplementary material
Source: PubMed Central journal article supplement (PMC4165615)
Supplement: 42_2014-03_3.pdf [file 42_2014-03_3.pdf]

**Table S3. MST results of Chinese SFGR isolates using *RR0155-rpmb* primer pairs**

| <b>Genotype</b>            | <b>Isolates</b> | <b>nt.16</b> | <b>nt.25</b> | <b>nt.48</b> | <b>nt.50</b> | <b>nt.81</b> | <b>nt.95</b> | <b>nt.175</b> | <b>nt.187</b> | <b>nt.214</b> | <b>nt.232</b> | <b>nt.247</b> | <b>nt.260</b> |
|----------------------------|-----------------|--------------|--------------|--------------|--------------|--------------|--------------|---------------|---------------|---------------|---------------|---------------|---------------|
| <i>R.heilongjiangensis</i> |                 | G            | T            | T            | A            | C            | T            | T             | T             | T             | A             | T             | A             |
| A3(1)                      | m29             | -            | T            | T            | A            | C            | T            | T             | T             | T             | A             | T             | A             |
| B3(1)                      | m7              | G            | C            | T            | A            | C            | T            | T             | T             | T             | A             | T             | A             |
| C3(1)                      | h11             | G            | T            | C            | A            | C            | T            | T             | T             | T             | A             | T             | A             |
| D3(1)                      | h12             | G            | T            | T            | G            | C            | T            | T             | T             | T             | A             | T             | A             |
| E3(1)                      | h6              | G            | T            | T            | A            | T            | T            | T             | C             | T             | A             | T             | A             |
| F3(1)                      | m11             | G            | T            | T            | A            | C            | C            | C             | T             | T             | A             | T             | A             |
| G3(1)                      | m12             | G            | T            | T            | A            | C            | T            | T             | T             | C             | A             | T             | A             |
| H3(1)                      | h22             | G            | T            | T            | A            | C            | T            | T             | T             | T             | T             | T             | A             |
| I3(1)                      | h21             | G            | T            | T            | A            | C            | T            | T             | T             | T             | A             | C             | A             |
| J3(1)                      | m9              | G            | T            | T            | A            | C            | T            | T             | T             | T             | A             | T             | G             |
| K3(52)                     | h15             | G            | T            | T            | A            | C            | T            | T             | T             | T             | A             | T             | A             |

nt297
