# Supplementary material
Source: PubMed Central journal article supplement (PMC4165615)
Supplement: 42_2014-03_4.pdf [file 42_2014-03_4.pdf]

**Table S4. MST results of Chinese SFGR isolates using *RR0345-tolC* primer pairs**

| Genotype                   | Isolates | nt.5 | nt.11 | nt.16 | nt.53 | nt.69 | nt.79 | nt.81 | nt.83 | nt.100 | nt.105 | nt.111 | nt.119 | nt.152 | nt.159 | nt.172 | nt.173 | nt.192 | nt.212 |
|----------------------------|----------|------|-------|-------|-------|-------|-------|-------|-------|--------|--------|--------|--------|--------|--------|--------|--------|--------|--------|
| <i>R.heilongjiangensis</i> |          | -    | T     | T     | A     | T     | A     | T     | T     | T      | T      | A      | T      | T      | T      | T      | T      | T      | A      |
| A4(1)                      | m22      | G    | C     | G     | A     | T     | A     | T     | T     | T      | T      | A      | T      | T      | T      | T      | T      | T      | A      |
| B4(1)                      | m7       | -    | C     | G     | G     | T     | A     | T     | T     | T      | T      | A      | T      | T      | T      | T      | T      | T      | A      |
| C4(1)                      | m23      | -    | C     | G     | A     | C     | A     | T     | T     | T      | T      | A      | T      | T      | T      | T      | T      | T      | A      |
| D4(1)                      | h6       | -    | C     | G     | A     | T     | G     | T     | T     | T      | T      | A      | T      | T      | T      | T      | T      | T      | A      |
| E4(1)                      | m14      | -    | C     | G     | A     | T     | A     | C     | T     | T      | T      | A      | T      | T      | T      | T      | T      | T      | A      |
| F4(1)                      | h4       | -    | C     | G     | A     | T     | A     | T     | C     | T      | T      | A      | T      | T      | T      | T      | T      | T      | A      |
| G4(1)                      | m5       | -    | C     | G     | A     | T     | A     | T     | T     | C      | T      | A      | T      | T      | T      | T      | T      | C      | A      |
| H4(1)                      | h26      | -    | C     | G     | A     | T     | A     | T     | T     | T      | C      | A      | T      | T      | T      | T      | T      | T      | A      |
| I4(1)                      | h8       | -    | C     | G     | A     | T     | A     | T     | T     | T      | T      | G      | T      | T      | C      | T      | T      | T      | A      |
| J4(1)                      | m8       | -    | C     | G     | A     | T     | A     | T     | T     | T      | T      | A      | C      | T      | T      | T      | T      | T      | A      |
| K4(1)                      | m34      | -    | C     | G     | A     | T     | A     | T     | T     | T      | T      | A      | T      | T      | T      | C      | T      | T      | G      |
| L4(1)                      | m27      | -    | C     | G     | A     | T     | A     | T     | T     | T      | T      | A      | T      | T      | T      | T      | -      | T      | A      |
| M4(50)                     | h3       | -    | C     | G     | A     | T     | A     | T     | T     | T      | T      | A      | T      | T      | T      | T      | T      | T      | A      |

nt 238
