# Supplementary material
Source: PubMed Central journal article supplement (PMC4165615)
Supplement: 42_2014-03_5.pdf [file 42_2014-03_5.pdf]

**Table S5. MST results of Chinese SFGR isolates using *cspA-ksgA* primer pairs**

| Genotype                   | Isolates | nt. 29 | nt. 55 | nt. 69 | nt. 98 | nt. 11 | nt. 12 | nt. 14 | nt. 15 | nt. 17 | nt. 19 | nt. 20 | nt. 21 | nt. 23 | nt. 23 | nt. 23 | Nt 244 | nt. 25 | nt. 26 | nt. 26 | nt. 26 | nt. 27 | nt. 29 | nt. 31 | nt.3 40 | nt. 35 | nt. 36 | nt. 36 | nt. 40 |   |
|----------------------------|----------|--------|--------|--------|--------|--------|--------|--------|--------|--------|--------|--------|--------|--------|--------|--------|--------|--------|--------|--------|--------|--------|--------|--------|---------|--------|--------|--------|--------|---|
| <i>R.heilongjiangensis</i> |          | A      | A      | A      | A      | T      | T      | A      | G      | A      | T      | T      | A      | A      | A      | G      | A      | A      | T      | T      | T      | T      | A      | A      | A       | A      | A      | A      | T      | A |
| A5(1)                      | m3       | G      | A      | A      | A      | T      | T      | A      | G      | A      | T      | T      | A      | A      | A      | G      | A      | A      | T      | T      | T      | T      | A      | A      | A       | A      | A      | T      | A      |   |
| B5(1)                      | h23      | A      | G      | A      | A      | T      | T      | A      | G      | A      | T      | T      | A      | A      | A      | G      | A      | A      | T      | T      | T      | C      | A      | A      | A       | A      | A      | T      | A      |   |
| C5(1)                      | h8       | A      | A      | G      | A      | T      | T      | A      | G      | A      | T      | T      | A      | A      | A      | G      | A      | A      | T      | T      | T      | T      | A      | A      | A       | A      | A      | T      | A      |   |
| D5(1)                      | h7       | A      | A      | A      | T      | T      | T      | A      | G      | A      | T      | T      | A      | A      | A      | G      | A      | A      | T      | T      | T      | T      | A      | A      | A       | A      | A      | T      | A      |   |
| E5(1)                      | m32      | A      | A      | A      | A      | C      | T      | A      | G      | G      | T      | T      | A      | A      | A      | G      | A      | A      | T      | T      | T      | T      | A      | G      | A       | A      | A      | T      | A      |   |
| F5(1)                      | m31      | A      | A      | A      | G      | T      | C      | A      | G      | A      | C      | T      | A      | A      | A      | G      | A      | A      | T      | T      | T      | T      | A      | A      | A       | A      | A      | T      | A      |   |
| G5(1)                      | h2       | A      | A      | A      | A      | T      | T      | G      | G      | A      | T      | T      | A      | A      | A      | G      | A      | A      | T      | T      | T      | T      | A      | A      | A       | A      | A      | T      | A      |   |
| H5(1)                      | m6       | A      | A      | A      | A      | T      | T      | A      | A      | A      | T      | T      | A      | A      | A      | G      | A      | A      | T      | T      | T      | T      | A      | A      | A       | A      | A      | T      | A      |   |
| I5(1)                      | h6       | A      | A      | A      | A      | T      | T      | A      | G      | A      | T      | C      | G      | A      | A      | G      | A      | A      | T      | T      | T      | T      | A      | A      | A       | A      | A      | T      | A      |   |
| J5(1)                      | m13      | A      | A      | A      | A      | T      | T      | A      | G      | A      | T      | T      | A      | G      | A      | G      | A      | A      | T      | T      | T      | T      | A      | A      | A       | A      | A      | T      | A      |   |
| K5(1)                      | h18      | A      | A      | A      | A      | T      | T      | A      | G      | A      | T      | T      | A      | A      | G      | G      | A      | A      | T      | T      | T      | T      | A      | A      | A       | A      | A      | T      | A      |   |
| L5(1)                      | h24      | A      | A      | A      | A      | T      | T      | A      | G      | A      | T      | T      | A      | A      | A      | A      | A      | A      | T      | T      | T      | T      | A      | A      | A       | A      | A      | T      | A      |   |
| M5(1)                      | m20      | A      | A      | A      | A      | T      | T      | A      | G      | A      | T      | T      | A      | A      | A      | G      | G      | A      | T      | T      | T      | T      | A      | A      | G       | A      | A      | C      | A      |   |
| N5(1)                      | h1       | A      | A      | A      | A      | T      | T      | A      | G      | A      | T      | T      | A      | A      | A      | G      | A      | G      | T      | T      | C      | T      | A      | A      | A       | A      | A      | T      | A      |   |
| O5(1)                      | m12      | A      | A      | A      | A      | T      | T      | A      | G      | A      | T      | T      | A      | A      | A      | G      | A      | A      | C      | T      | T      | T      | A      | A      | A       | A      | A      | T      | A      |   |
| P5(1)                      | m29      | A      | A      | A      | A      | T      | T      | A      | G      | A      | T      | T      | A      | A      | A      | G      | A      | A      | T      | C      | T      | T      | A      | A      | A       | A      | A      | T      | A      |   |
| Q5(1)                      | h27      | A      | A      | A      | A      | T      | T      | A      | G      | A      | T      | T      | A      | A      | A      | G      | A      | A      | T      | T      | T      | T      | T      | A      | A       | A      | A      | T      | A      |   |
| R5(2)                      | m26      | A      | A      | A      | A      | T      | T      | A      | G      | A      | T      | T      | A      | A      | A      | G      | A      | A      | T      | T      | T      | T      | A      | A      | G       | A      | A      | T      | A      |   |
| S5(1)                      | h20      | A      | A      | A      | A      | T      | T      | A      | G      | A      | T      | T      | A      | A      | A      | G      | A      | A      | T      | T      | T      | T      | A      | A      | A       | G      | A      | T      | A      |   |
| T5(2)                      | h4       | A      | A      | A      | A      | T      | T      | A      | G      | A      | T      | T      | A      | A      | A      | G      | A      | A      | T      | T      | T      | T      | A      | A      | A       | A      | G      | T      | A      |   |
| U5(1)                      | m8       | A      | A      | A      | A      | T      | T      | A      | G      | A      | T      | T      | A      | A      | A      | G      | A      | A      | T      | T      | T      | T      | A      | A      | A       | A      | A      | T      | -      |   |
| V5(37)                     | h3       | A      | A      | A      | A      | T      | T      | A      | G      | A      | T      | T      | A      | A      | A      | G      | A      | A      | T      | T      | T      | T      | A      | A      | A       | A      | A      | T      | A      |   |
