# Supplementary material
Source: PubMed Central journal article supplement (PMC4165615)
Supplement: 42_2014-03_6.pdf [file 42_2014-03_6.pdf]

**Table S6. MST results of Chinese SFGR isolates using *RR1240-tlc5b* primer pairs**

| Genotype                   | Isolat | n  | n  | n  | n  | n  | n  | n  | n  | n  | n  | n  | nt. | nt.1 | nt.1 | nt.1 | nt. | nt.1 | nt. | nt. | nt. | nt. | nt. | nt. | nt.2 | nt.2 | nt. | nt. | nt. | nt. | nt. | n  | n  |    |   |   |  |  |
|----------------------------|--------|----|----|----|----|----|----|----|----|----|----|----|-----|------|------|------|-----|------|-----|-----|-----|-----|-----|-----|------|------|-----|-----|-----|-----|-----|----|----|----|---|---|--|--|
|                            | es     | t. | 10  | 33   | 78   | 83   | 18  | 96   | 20  | 20  | 21  | 22  | 22  | 24  | 27   | 80   | 88  | 30  | 30  | 31  | 31  | 31 | t. | t. |   |   |  |  |
|                            |        | 1  | 3  | 3  | 4  | 4  | 5  | 5  | 5  | 7  | 7  | 8  | 3   |      |      | 6    |     | 4    | 8   | 1   | 0   | 8   | 8   | 3   |      |      | 0   | 1   | 1   | 2   | 5   | 3  | 3  |    |   |   |  |  |
|                            |        | 0  | 1  | 4  | 2  | 9  | 1  | 5  | 7  | 2  | 8  | 3  |     |      |      |      |     |      |     |     |     |     |     |     |      |      |     |     |     |     |     |    |    | 1  | 2 |   |  |  |
|                            |        |    |    |    |    |    |    |    |    |    |    |    |     |      |      |      |     |      |     |     |     |     |     |     |      |      |     |     |     |     |     |    |    |    | 7 | 7 |  |  |
| <i>R.heilongjiangensis</i> |        | A  | T  | T  | T  | A  | T  | T  | A  | T  | A  | A  | T   | T    | T    | G    | A   | A    | T   | A   | T   | T   | T   | C   | A    | A    | A   | T   | -   | G   | A   | T  | T  | T  | T | T |  |  |
| A6(1)                      | m5     | G  | C  | T  | T  | A  | T  | T  | A  | T  | A  | A  | T   | T    | T    | G    | A   | A    | T   | A   | C   | T   | T   | C   | A    | A    | A   | T   | -   | G   | A   | T  | T  | T  | T | T |  |  |
| B6(1)                      | m11    | G  | T  | C  | T  | A  | T  | T  | A  | T  | A  | A  | T   | T    | T    | A    | A   | T    | A   | T   | T   | T   | C   | A   | A    | A    | T   | -   | G   | A   | T   | T  | T  | T  | T | T |  |  |
| C6(1)                      | m1     | G  | T  | T  | C  | A  | T  | T  | A  | T  | A  | A  | T   | T    | T    | G    | A   | A    | T   | A   | T   | T   | T   | C   | A    | A    | A   | T   | -   | G   | A   | T  | T  | T  | T | T |  |  |
| D6(1)                      | h13    | G  | T  | T  | T  | G  | T  | T  | A  | T  | A  | A  | T   | T    | T    | G    | A   | A    | T   | A   | T   | T   | T   | C   | A    | A    | A   | T   | -   | G   | A   | T  | T  | T  | T | T |  |  |
| E6(1)                      | h14    | G  | T  | T  | T  | A  | C  | T  | A  | T  | A  | A  | T   | T    | T    | G    | A   | A    | T   | A   | T   | T   | T   | C   | A    | A    | A   | T   | -   | G   | A   | T  | T  | T  | T | T |  |  |
| F6(1)                      | m28    | G  | T  | T  | T  | A  | T  | C  | A  | T  | A  | A  | T   | T    | T    | G    | A   | A    | C   | A   | T   | T   | T   | C   | A    | A    | A   | T   | -   | G   | A   | T  | T  | T  | T | T |  |  |
| G6(1)                      | h25    | G  | T  | T  | T  | A  | T  | T  | G  | T  | A  | A  | T   | T    | T    | G    | A   | A    | T   | A   | T   | T   | T   | C   | A    | A    | A   | T   | -   | G   | A   | T  | C  | T  | T | T |  |  |
| H6(1)                      | h5     | G  | T  | T  | T  | A  | T  | T  | A  | C  | A  | A  | T   | T    | T    | G    | A   | A    | T   | A   | T   | T   | T   | C   | A    | A    | A   | -   | -   | G   | A   | T  | T  | C  | T | T |  |  |
| I6(1)                      | h1     | G  | T  | T  | T  | A  | T  | T  | A  | T  | G  | A  | T   | T    | T    | G    | A   | A    | T   | A   | T   | T   | T   | T   | A    | A    | A   | -   | -   | G   | A   | T  | T  | T  | T | T |  |  |
| J6(1)                      | h7     | G  | T  | T  | T  | A  | T  | T  | A  | T  | A  | G  | T   | T    | T    | G    | A   | A    | T   | A   | T   | T   | T   | C   | A    | G    | A   | T   | -   | G   | A   | T  | T  | T  | T | T |  |  |
| 6(1)                       | h27    | G  | T  | T  | T  | A  | T  | T  | A  | T  | A  | A  | C   | T    | T    | G    | A   | A    | T   | A   | T   | T   | T   | C   | A    | A    | A   | T   | -   | G   | A   | T  | T  | T  | T | T |  |  |
| L6(1)                      | h6     | G  | T  | T  | T  | A  | T  | T  | A  | T  | A  | A  | T   | T    | C    | G    | A   | A    | T   | G   | T   | T   | T   | C   | G    | A    | A   | T   | T   | G   | A   | T  | T  | T  | T | T |  |  |
| M6(1)                      | h23    | G  | T  | T  | T  | A  | T  | T  | A  | T  | A  | A  | T   | T    | T    | G    | G   | A    | T   | A   | T   | T   | T   | C   | A    | A    | A   | -   | -   | G   | A   | T  | T  | T  | T | T |  |  |
| N6(1)                      | h17    | G  | T  | T  | T  | A  | T  | T  | A  | T  | A  | A  | T   | T    | T    | G    | A   | -    | T   | A   | T   | T   | T   | C   | A    | A    | A   | T   | -   | G   | A   | T  | T  | T  | T | T |  |  |
| O6(1)                      | m14    | G  | T  | T  | T  | A  | T  | T  | A  | T  | A  | A  | T   | T    | T    | G    | A   | A    | C   | A   | T   | T   | T   | C   | A    | A    | A   | T   | -   | G   | A   | T  | T  | T  | T | T |  |  |
| P6(1)                      | m17    | G  | T  | T  | T  | A  | T  | T  | A  | T  | A  | A  | T   | T    | T    | G    | A   | A    | T   | A   | T   | A   | T   | C   | A    | A    | A   | T   | -   | G   | A   | T  | T  | T  | T | T |  |  |
| Q6(1)                      | m20    | G  | T  | T  | T  | A  | T  | T  | A  | T  | A  | A  | T   | T    | T    | G    | A   | A    | T   | A   | T   | C   | T   | C   | A    | A    | A   | T   | -   | G   | A   | T  | T  | T  | T | T |  |  |
| R6(1)                      | m23    | G  | T  | T  | T  | A  | T  | T  | A  | T  | A  | A  | T   | T    | T    | G    | A   | A    | T   | A   | T   | T   | C   | C   | A    | A    | A   | T   | T   | G   | A   | T  | T  | T  | T | T |  |  |
| S6(1)                      | m2     | G  | T  | T  | T  | A  | T  | T  | A  | T  | A  | A  | T   | T    | T    | G    | A   | A    | T   | A   | T   | T   | T   | C   | A    | A    | A   | T   | -   | -   | A   | T  | T  | T  | T | T |  |  |
| T6(1)                      | m7     | G  | T  | T  | T  | A  | T  | T  | A  | T  | A  | A  | T   | T    | T    | G    | A   | A    | T   | A   | T   | T   | T   | C   | A    | A    | A   | T   | -   | G   | G   | T  | T  | T  | T | T |  |  |
| U6(1)                      | m3     | G  | T  | T  | T  | A  | T  | T  | A  | T  | A  | A  | T   | T    | T    | G    | A   | A    | T   | A   | T   | T   | T   | C   | A    | A    | A   | T   | -   | G   | A   | C  | T  | T  | T | T |  |  |
| V6(1)                      | m13    | G  | T  | T  | T  | A  | T  | T  | A  | T  | A  | A  | T   | T    | T    | G    | A   | A    | T   | A   | T   | T   | T   | C   | A    | A    | G   | T   | -   | G   | A   | T  | T  | T  | T | T |  |  |
| W6(8)                      | h8     | G  | T  | T  | T  | A  | T  | T  | A  | T  | A  | A  | T   | T    | T    | G    | A   | A    | T   | A   | T   | T   | T   | C   | A    | A    | A   | -   | -   | G   | A   | T  | T  | T  | T | T |  |  |
| X6(1)                      | h15    | G  | T  | T  | T  | A  | T  | T  | A  | T  | A  | A  | T   | C    | T    | G    | A   | A    | T   | A   | T   | T   | T   | C   | A    | A    | A   | T   | -   | G   | A   | T  | T  | T  | T | T |  |  |
| Y6(31)                     | h3     | G  | T  | T  | T  | A  | T  | T  | A  | T  | A  | A  | T   | T    | T    | G    | A   | A    | T   | A   | T   | T   | T   | C   | A    | A    | A   | T   | -   | G   | A   | T  | T  | T  | T | T |  |  |
